# Supplementary material for: Tuning the high-entropy perovskite as efficient and reliable electrocatalysts for oxygen evolution reaction
Source: Royal Society of Chemistry journal article supplement (doi:10.1039/d4ra02680b), 2024-01-01
Supplement: d4ra02680b1.pdf [file d4ra02680b1.pdf]

## Supporting Information

### **Tuning the high-entropy perovskite as efficient and reliable electrocatalysts for oxygen evolution reaction**

*Ruixue Wei<sup>1</sup>, Gaoliang Fu<sup>2\*</sup>, Huafeng Qi<sup>2</sup>, Hwei Liu<sup>2</sup>,*

*1 Department of Cerebrovascular Diseases, The Second Affiliated Hospital of Zhengzhou University, Zhengzhou 450052, Henan, China*

*2 Henan Provincial Key Laboratory of Nanocomposites and Applications, Institute of Nanostructured Functional Materials, Huanghe Science and Technology College, Zhengzhou, Henan 450006, China*

Email: [fugl@hhstu.edu.cn](mailto:fugl@hhstu.edu.cn) (G. F.)

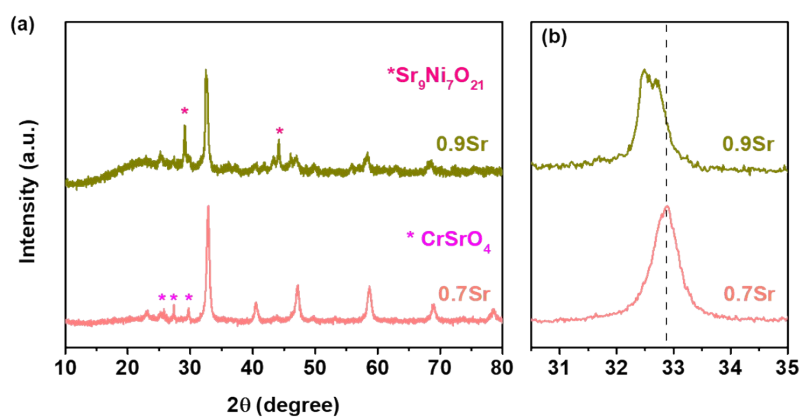

**Fig. S1.** (a) XRD patterns for 0.7Sr and 0.9Sr. There is a small amount of inactive  $\text{CrSrO}_4$  impurity in 0.7Sr. In the 0.9Sr, the impurity of  $\text{Sr}_9\text{Ni}_7\text{O}_{21}$  is observed, which is active for OER. (b) Expanded XRD patterns. The peak for 0.9Sr shift toward low angle compared with 0.7Sr, which is likely to be caused by the impurity of  $\text{Sr}_9\text{Ni}_7\text{O}_{21}$  existed in 0.9Sr.

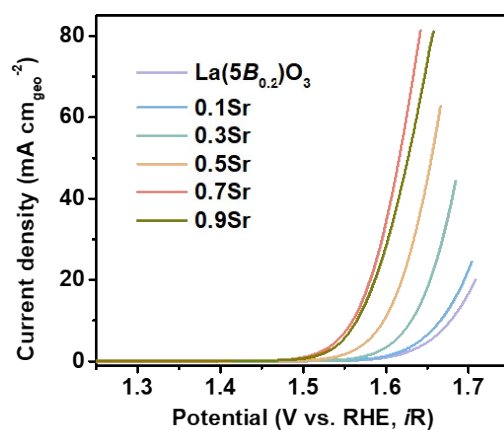

**Fig. S2.** LSV curves for  $\text{La}_{1-x}\text{Sr}_x(5\text{B}_{0.2})\text{O}_3$  ( $x = 0, 0.1, 0.3, 0.5, 0.7$  and  $0.9$ ). Among them, 0.7Sr delivers the best OER performance. Compared with 0.7Sr, 0.9Sr shows slightly low activity, which may be due to the presence of more  $\text{Sr}_9\text{Ni}_7\text{O}_{21}$  impurities.

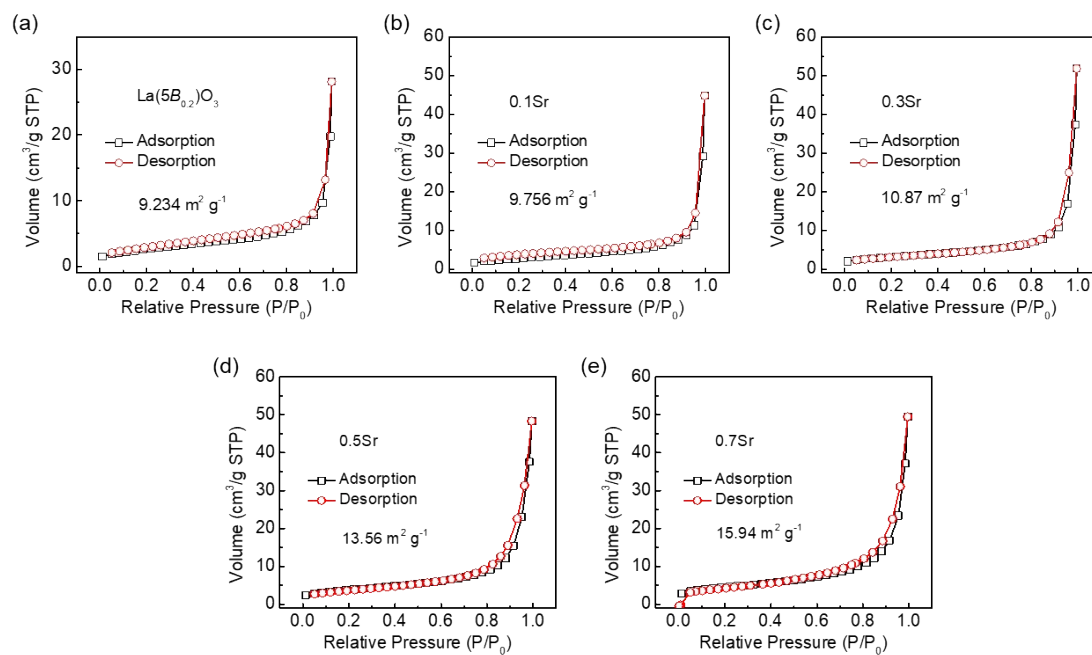

**Fig. S3.** Brunauer-Emmett-Teller (BET) measurements for  $\text{La}_{1-x}\text{Sr}_x(5\text{B}_{0.2})\text{O}_3$ . Nitrogen adsorption and desorption isotherms measured at 77 K of (a)  $\text{La}(5\text{B}_{0.2})\text{O}_3$ , (b) 0.1Sr, (c) 0.3Sr, (d) 0.5Sr and (e) 0.7Sr.

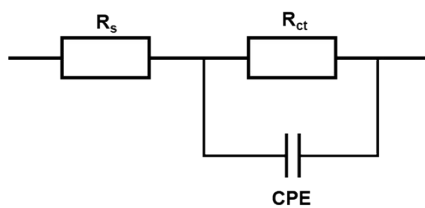

**Fig. S4.** Equivalent circuit. It consists of an electrolyte resistance ( $R_s$ ), a charge transfer resistance ( $R_{ct}$ ), and a constant phase element (CPE).

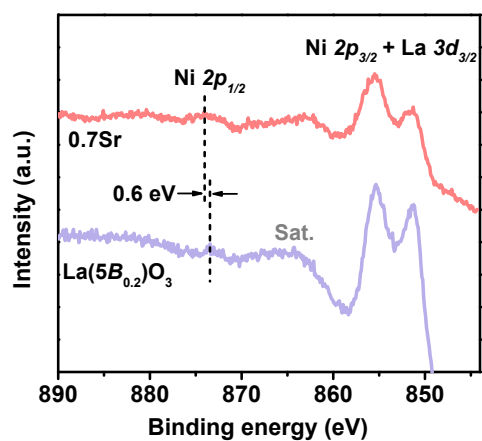

**Fig. S5.** XPS core level spectra of Ni  $2p$  for  $\text{La}(5B_{0.2})\text{O}_3$  and  $0.7\text{Sr}$ . Compared to  $\text{La}(5B_{0.2})\text{O}_3$ , a positive shift of  $0.6\text{ eV}$  is observed in Ni  $2p_{1/2}$  peak for  $0.7\text{Sr}$ , indicating the formation of more high-valence  $\text{Ni}^{3+}$ .

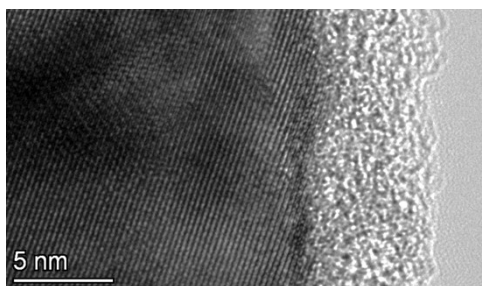

**Fig. S6.** TEM image for 0.7Sr after OER tests. As seen, an amorphous layer with a thickness of ~5 nm is observed at the surface of catalyst, suggestive of the structural reconstruction during OER.

**Table S1.** XPS data for  $\text{La}_{1-x}\text{Sr}_x(5\text{B}_{0.2})\text{O}_3$ 

| <b>Sample</b>                            | <b>Cr<sup>6+</sup>/Cr<sup>3+</sup></b> | <b>Mn<sup>4+</sup>/Mn<sup>3+</sup></b> | <b>Fe<sup>4+</sup>/Fe<sup>3+</sup></b> | <b>Fe<sup>3+</sup>/Fe<sup>2+</sup></b> | <b>Co<sup>4+</sup>/Co<sup>3+</sup></b> | <b>Co<sup>3+</sup>/Co<sup>2+</sup></b> | <b>Ni<sup>3+</sup>/Ni<sup>2+</sup></b> | <b>OH<sub>adsorbed</sub>/O<sub>Lattice</sub></b> |
|------------------------------------------|----------------------------------------|----------------------------------------|----------------------------------------|----------------------------------------|----------------------------------------|----------------------------------------|----------------------------------------|--------------------------------------------------|
| <b>La(5B<sub>0.2</sub>)O<sub>3</sub></b> | <b>1.10</b>                            | <b>0.72</b>                            | <b>0</b>                               | <b>3.32</b>                            | <b>0</b>                               | <b>1.35</b>                            | <b>0</b>                               | <b>0.96</b>                                      |
| <b>0.7Sr</b>                             | <b>2.62</b>                            | <b>5.09</b>                            | <b>0.37</b>                            | <b>-10.5</b>                           | <b>0.67</b>                            | <b>2.53</b>                            | <b>1.26</b>                            | <b>2.86</b>                                      |
